# Supplementary material
Source: Copernicus journal article supplement (doi:10.5194/egusphere-2026-2988)
Supplement: Supplementary file 1 [file egusphere-2026-2988-supplement.pdf]

Ocean Science  
Supporting Information

Ocean Science

Supporting Information for

## **Topographic control of tides in the Ross Sea: eddy-like structures, bottom-trapped waves, and energetics**

Yue Xia<sup>1</sup>, Hengling Leng<sup>2</sup>, Zhaomin Wang<sup>2</sup>, Craig Stevens<sup>3,4</sup>, Chengyan Liu<sup>2</sup>, Liangjun Yan<sup>5</sup>, Xianxian Han<sup>5</sup>, Dake Chen<sup>2,6</sup>

<sup>1</sup>School of Atmospheric Sciences, Sun Yat-sen University, and Southern Marine Science and Engineering Guangdong Laboratory (Zhuhai), Zhuhai, China.

<sup>2</sup>Southern Marine Science and Engineering Guangdong Laboratory (Zhuhai), Zhuhai, China.

<sup>3</sup>Earth Sciences New Zealand, Wellington, New Zealand.

<sup>4</sup>Dept. Physics, Univ. Auckland, Auckland, New Zealand.

<sup>5</sup>School of Marine Sciences, Sun Yat-sen University, Zhuhai, China.

<sup>6</sup>State Key Laboratory of Satellite Ocean Environment Dynamics, Second Institute of Oceanography, Ministry of Natural Resources, Hangzhou, China.

*Correspondence to:* Hengling Leng ([lenghengling@sml-zhuhai.cn](mailto:lenghengling@sml-zhuhai.cn))

**Contents of this file**

Table S1

Figures S1 to S17

**Introduction**

In this document, Table S1 summarizes the Model-Observation Comparison, including the mooring stations chosen, as well as the validation depths and time periods selected.

Figures S1-S16 show the comparison of the simulated and observed tidal currents at different mooring stations shown in Table S1

Figure S17 shows the depth-integrated energy flux (W/m) components, including the time-averaged values along with snapshots taken at high tide and low tide.

Ocean Science  
Supporting Information

Table S1. Model-Observation Comparison Summary

| Figure Number | Mooring Station | Validation Depth (m) | Validation Period                 |
|---------------|-----------------|----------------------|-----------------------------------|
| S1            | adp1            | 864 m                | 2003-03-06 21:00–2003-04-06 20:00 |
| S2            | adp2            | 504 m                | 2004-03-09 01:00–2004-04-09 00:00 |
| S3            | ca1             | 484 m                | 2003-03-02 07:00–2003-04-02 06:00 |
| S4            | cb1             | 404 m                | 2003-03-03 07:00–2003-03-15 19:00 |
| S5            | cb2             | 381 m                | 2003-04-01 00:00–2003-05-01 00:00 |
| 3             | cc1             | 449 m                | 2003-03-03-02:00–2003-04-03 01:00 |
| S6            | cd1             | 508 m                | 2003-03-02 21:00–2003-04-02 20:00 |
| S7            | ce1             | 1007 m               | 2003-03-03 20:00–2003-03-22 14:00 |
| S8            | ce2             | 1751 m               | 2003-04-01 00:00–2003-05-01 00:00 |
| S9            | eb1             | 586 m                | 2003-03-01 20:00–2003-04-01 19:00 |
| S10           | m1              | 478 m                | 2004-03-08 22:00–2004-04-08 21:00 |
| S11           | m3              | 491 m                | 2004-03-07 00:00–2004-04-06 23:00 |
| S12           | m4              | 384 m                | 2004-03-10 07:00–2004-04-10 06:00 |
| S13           | m5              | 1049 m               | 2004-03-09 07:00–2004-04-09 06:00 |
| S14           | wa1             | 587 m                | 2003-03-06 06:00–2003-04-06 05:00 |
| S15           | wb1             | 632 m                | 2003-03-06 02:00–2003-04-06 01:00 |
| S16           | wc1             | 1238 m               | 2003-03-04 02:00–2003-04-04 01:00 |

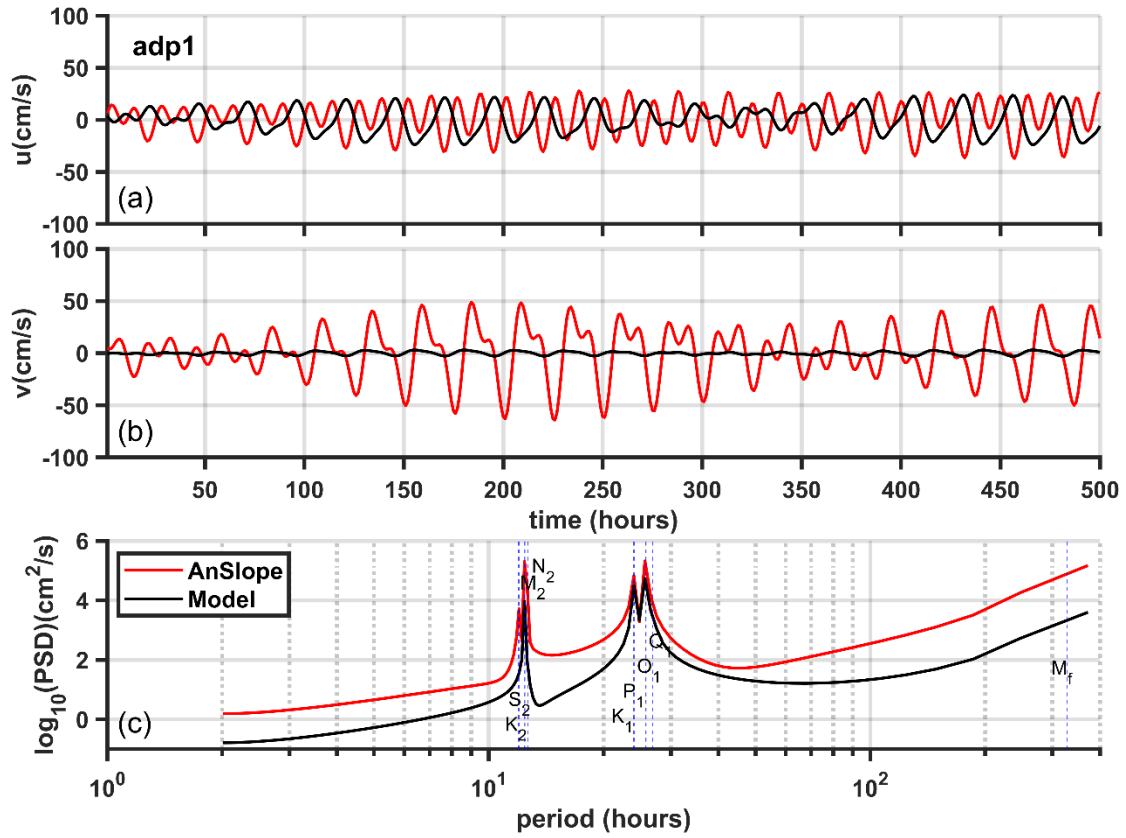

Figure S1. Comparison of the simulated tidal currents and observation from mooring adp1, showing the filtered time series (semi-diurnal and diurnal constituents) of the (a) meridional and (b) zonal tidal velocities, and (c) the corresponding power spectral density (PSD).

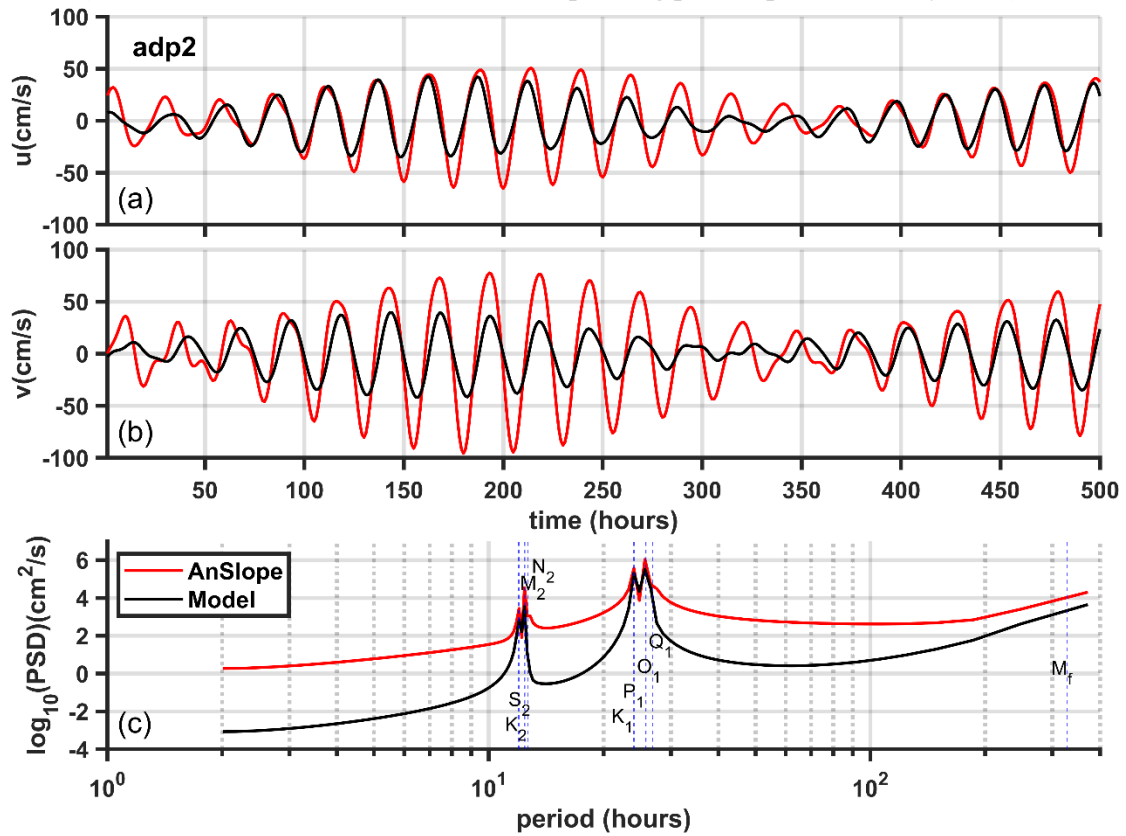

Figure S2. Comparison for mooring adp2, as in Figure S1.

Ocean Science  
Supporting Information

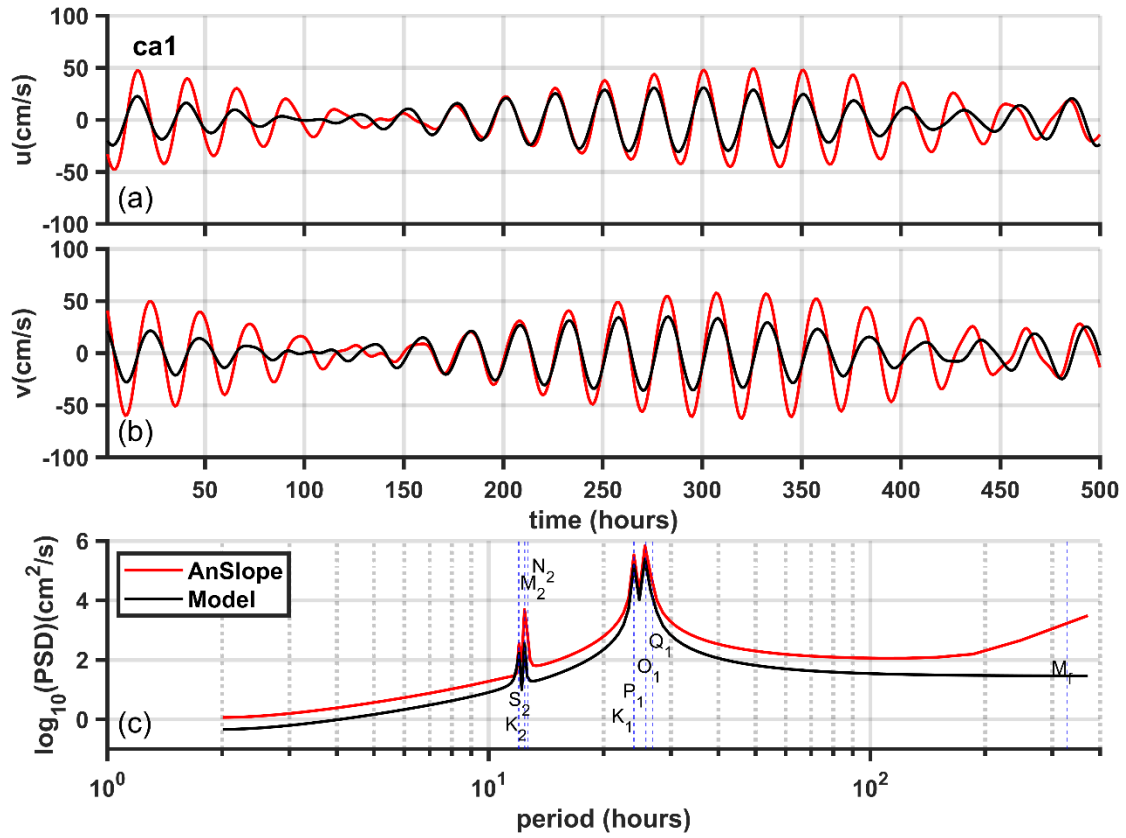

Figure S3. Comparison for mooring ca1, otherwise as in Figure S1.

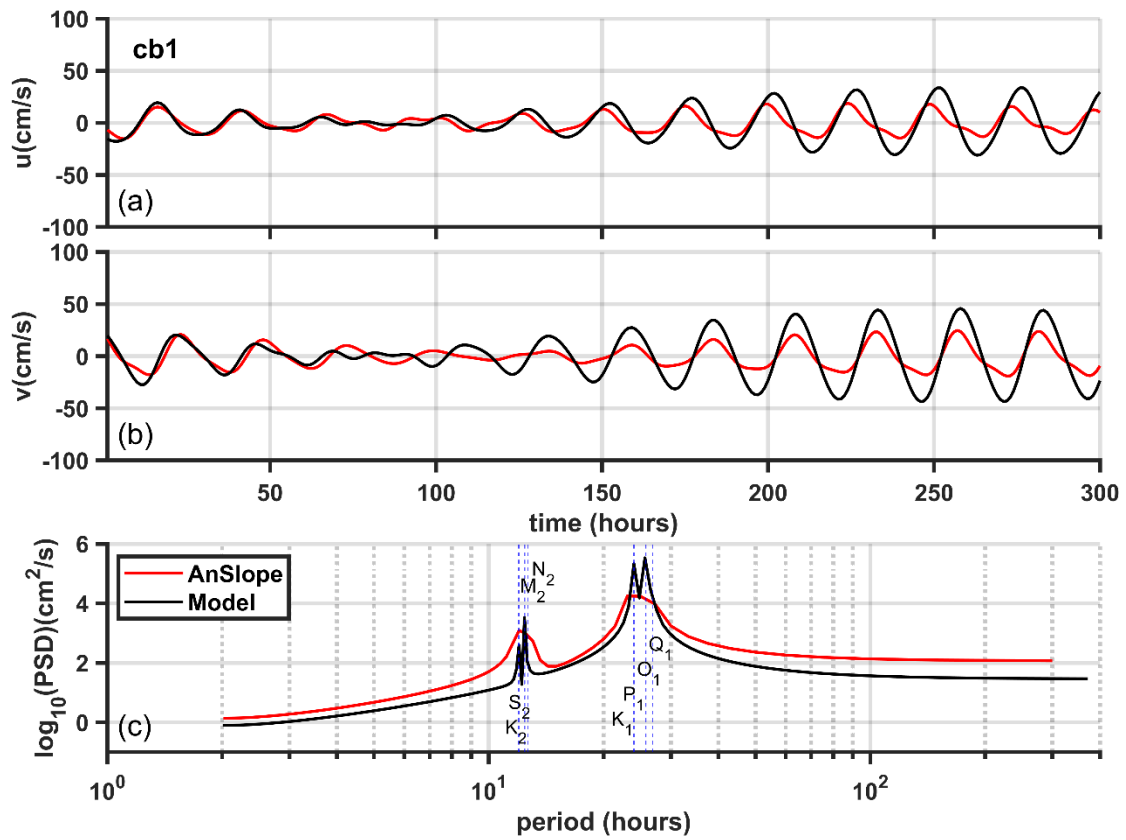

Figure S4. Comparison for mooring cb1, as in Figure S1.

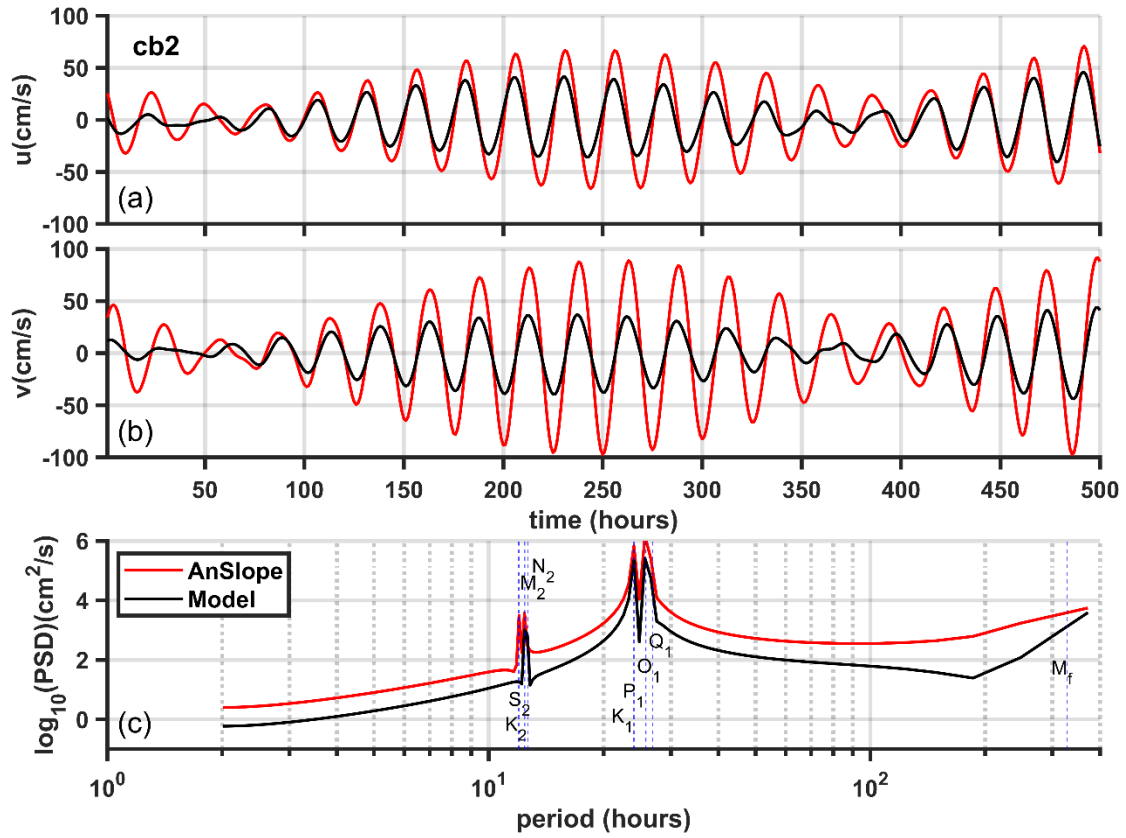

Figure S5. Comparison for mooring cb2, as in Figure S1.

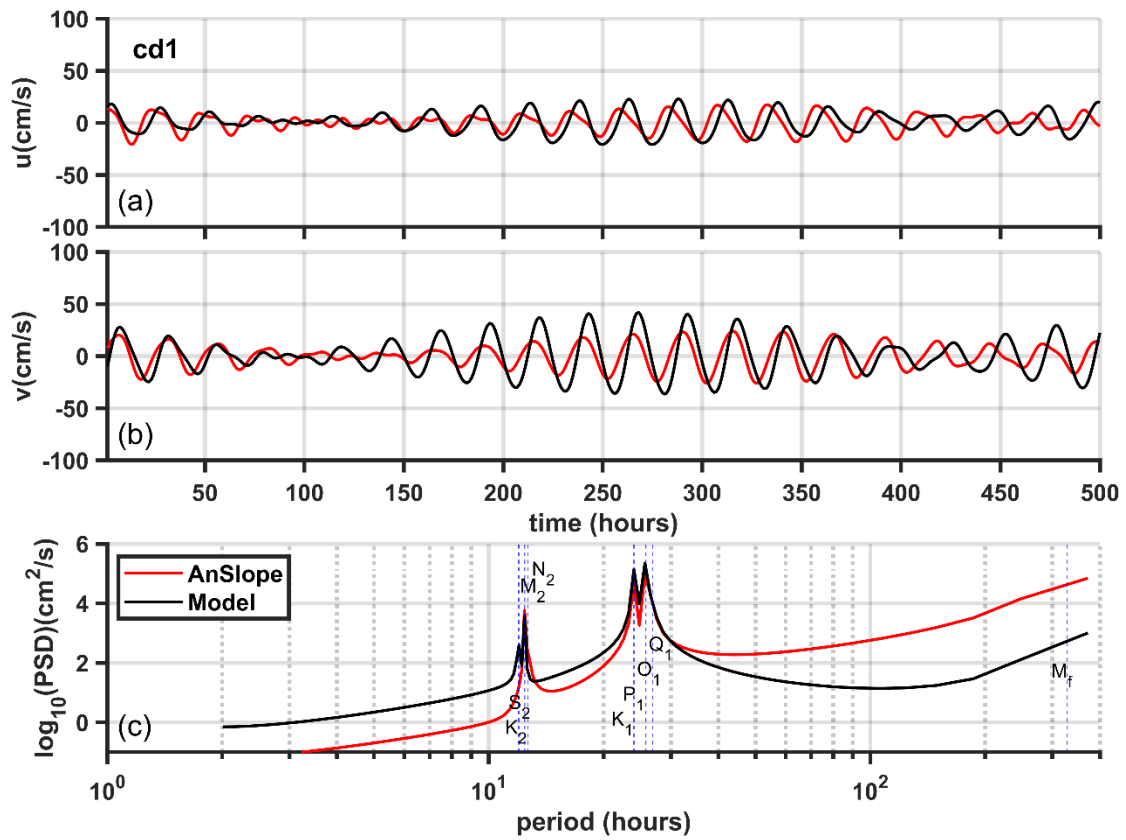

Figure S6. Comparison for mooring cd1, otherwise as in Figure S1.

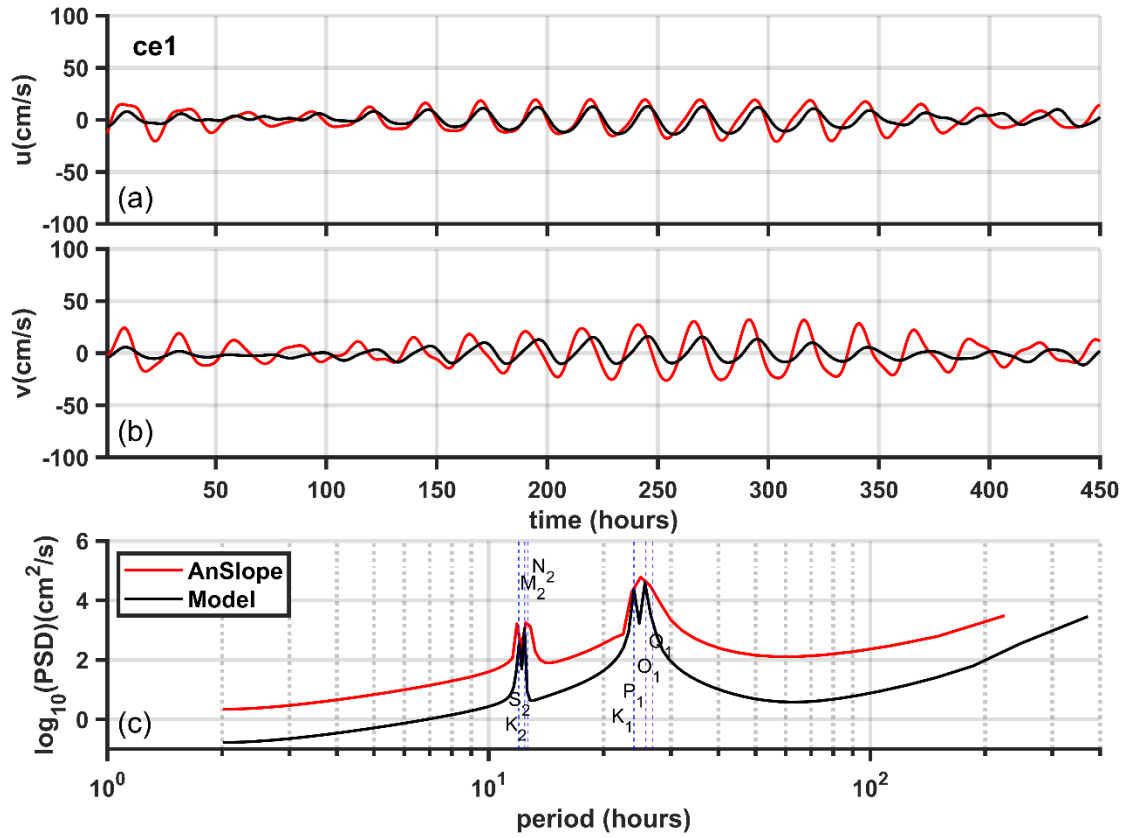

Figure S7. Comparison for mooring ce1, otherwise as in Figure S1.

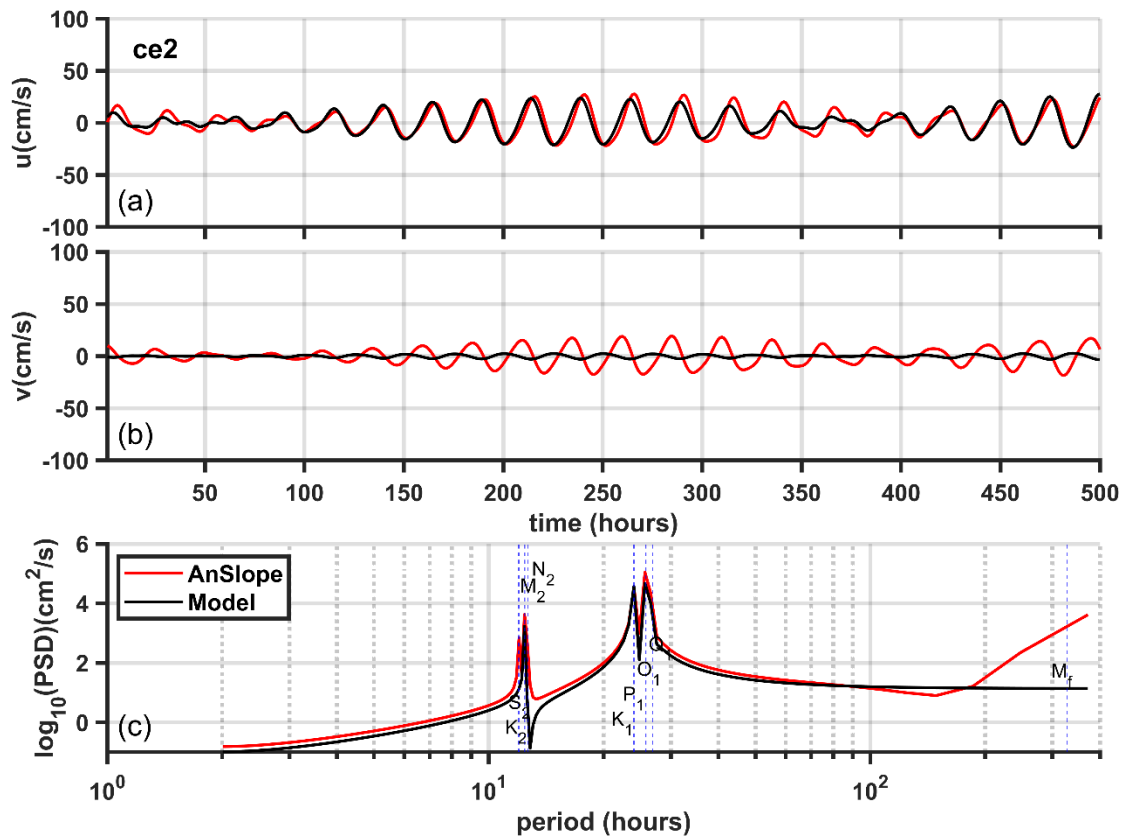

Figure S8. Comparison for mooring ce2, otherwise as in Figure S1.

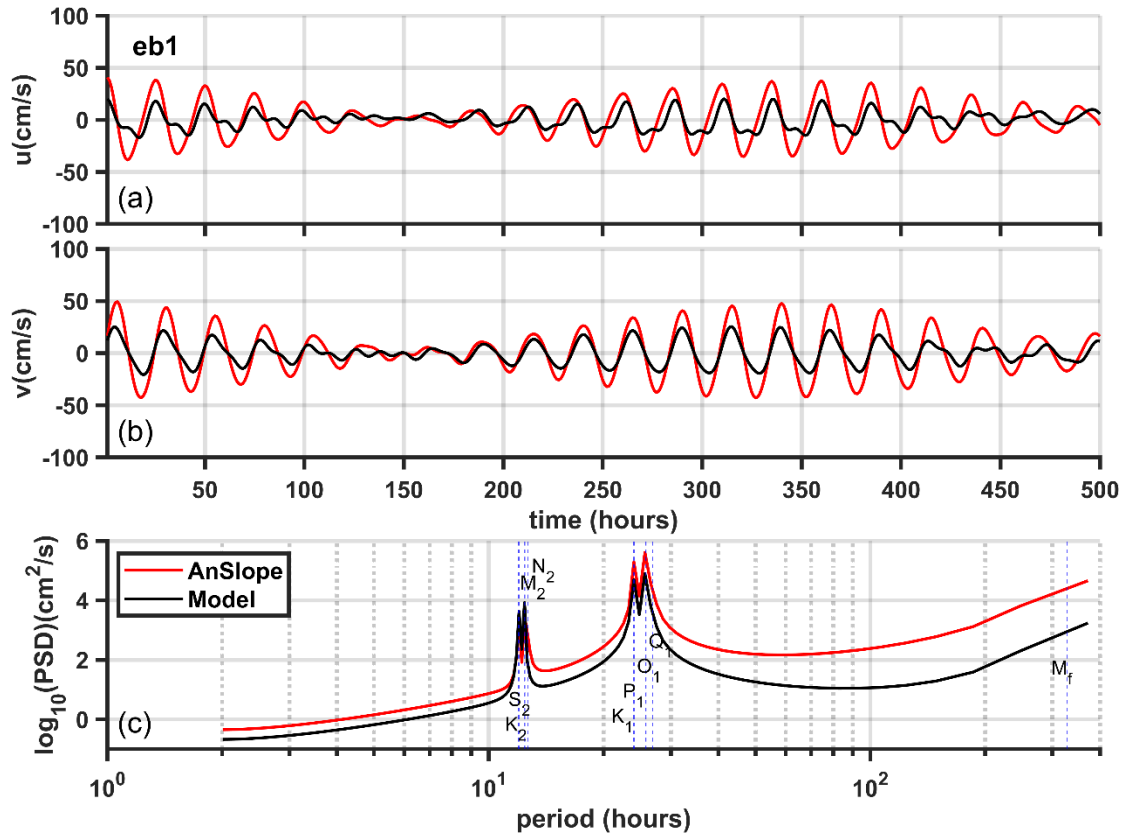

Figure S9. Comparison for mooring eb1, otherwise as in Figure S1.

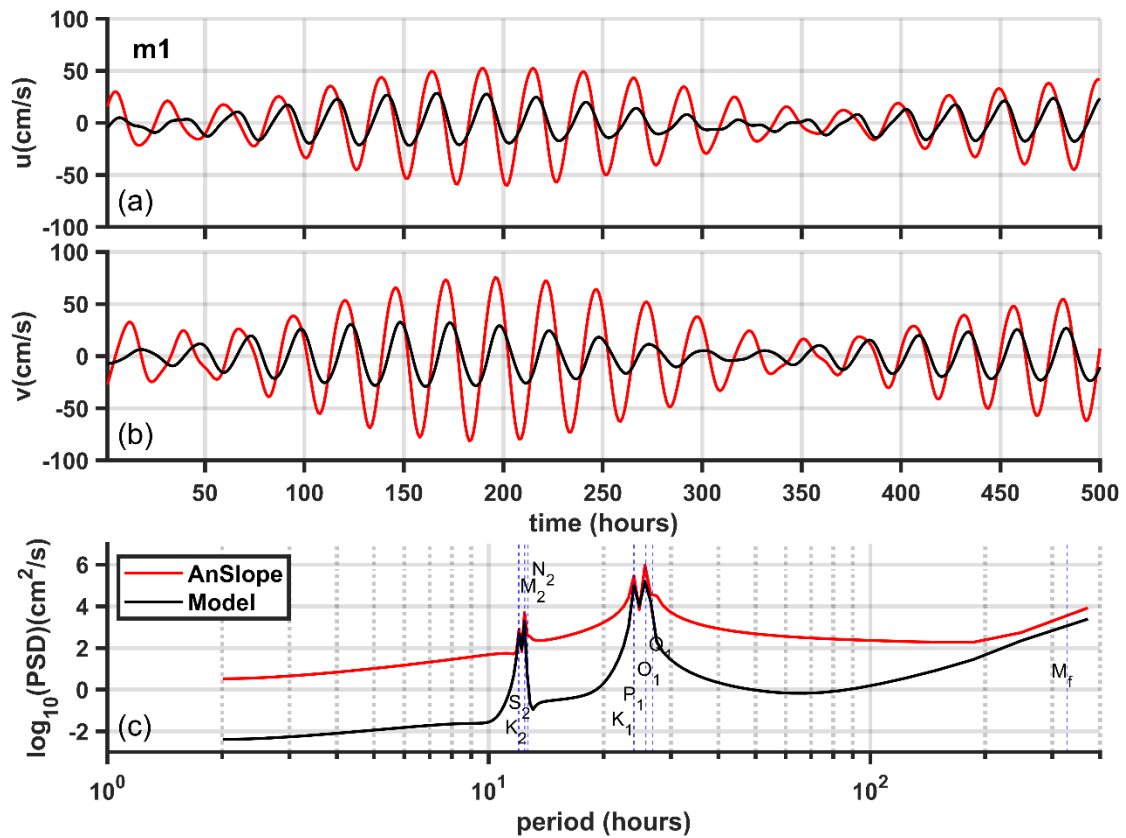

Figure S10. Comparison for mooring m1, otherwise as in Figure S1.

Ocean Science  
Supporting Information

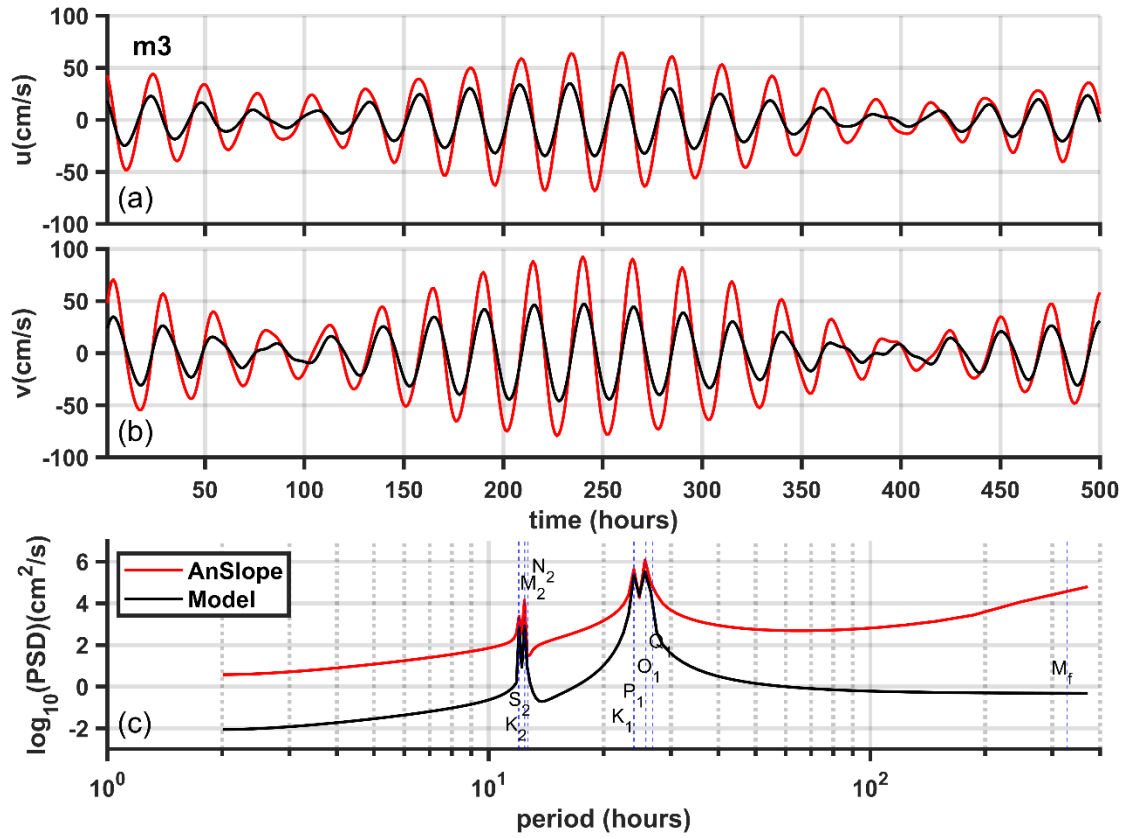

Figure S11. Comparison for mooring m3, otherwise as in Figure S1.

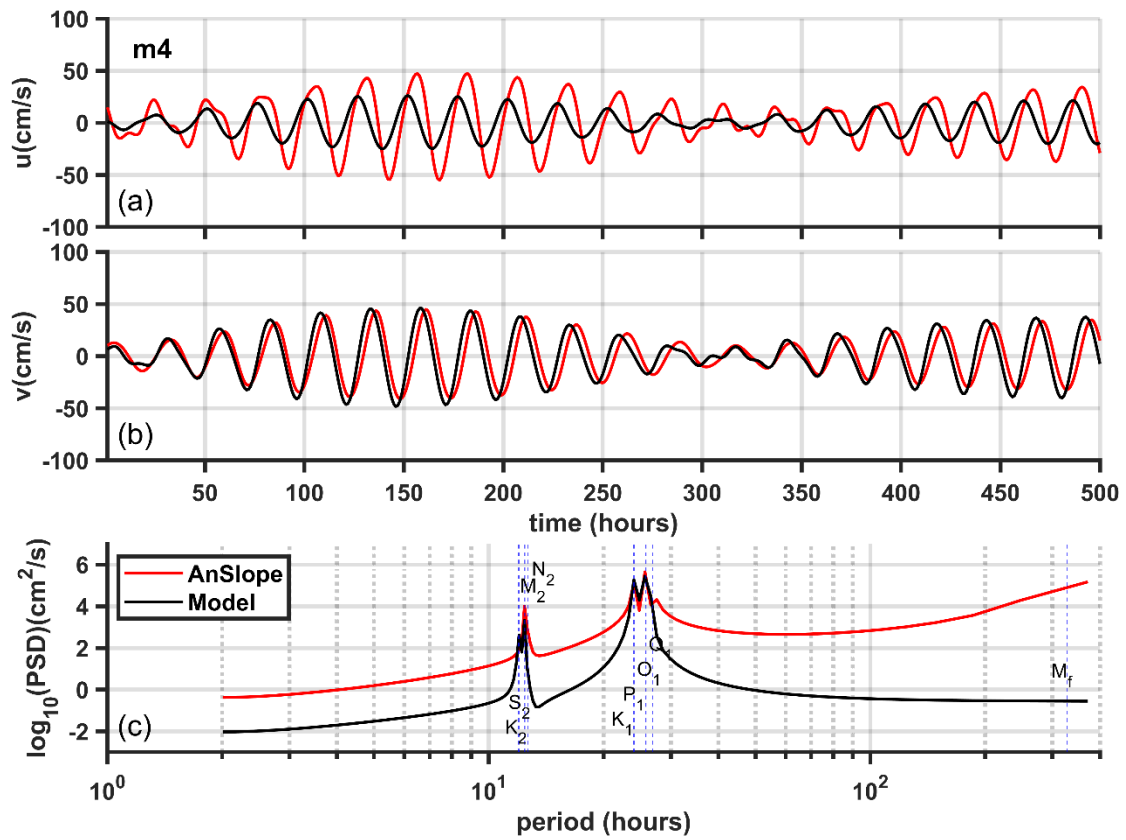

Figure S12. Comparison for mooring m4, otherwise as in Figure S1.

Ocean Science  
Supporting Information

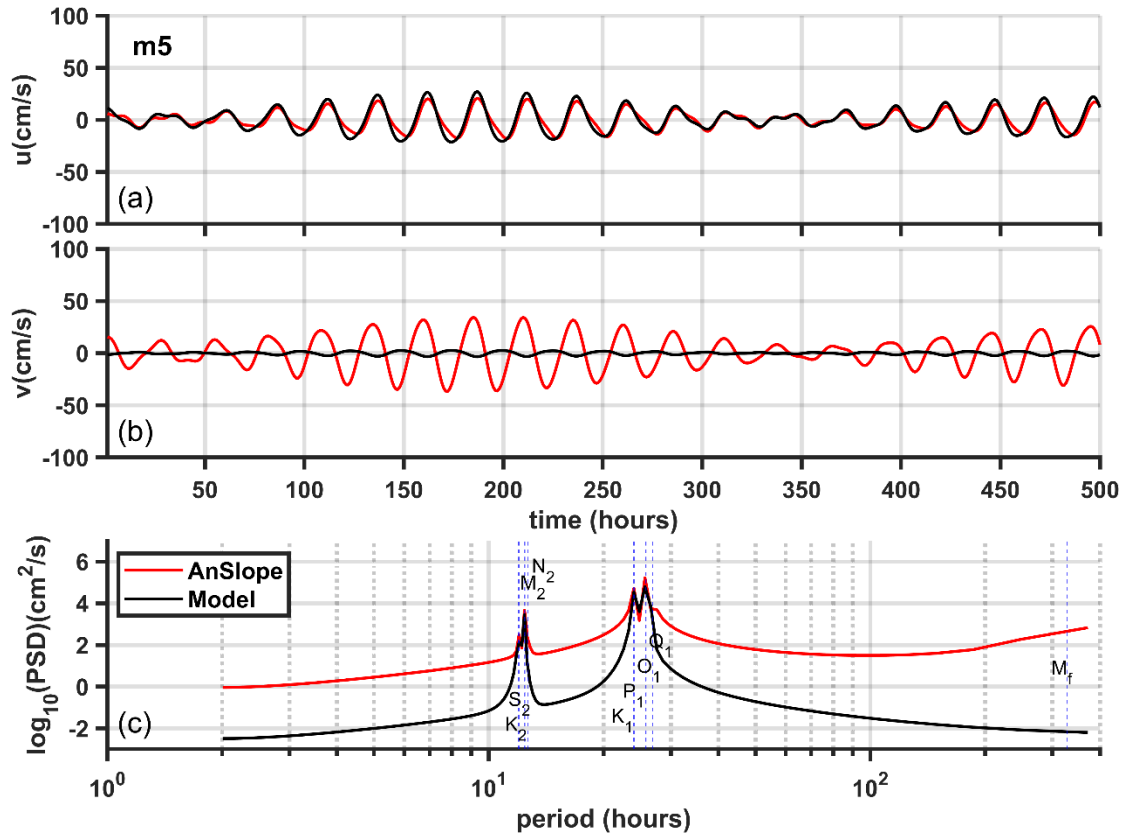

Figure S13. Comparison for mooring m5, otherwise as in Figure S1.

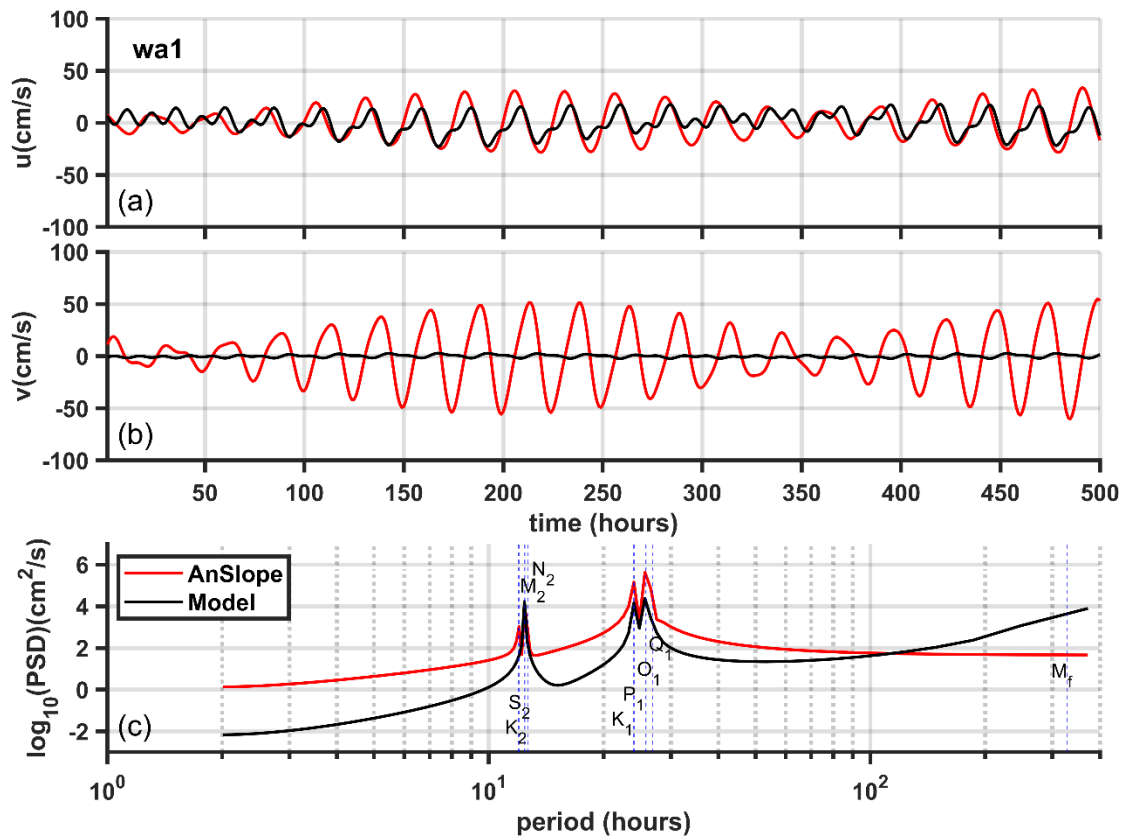

Figure S14. Comparison for mooring wa1, otherwise as in Figure S1.

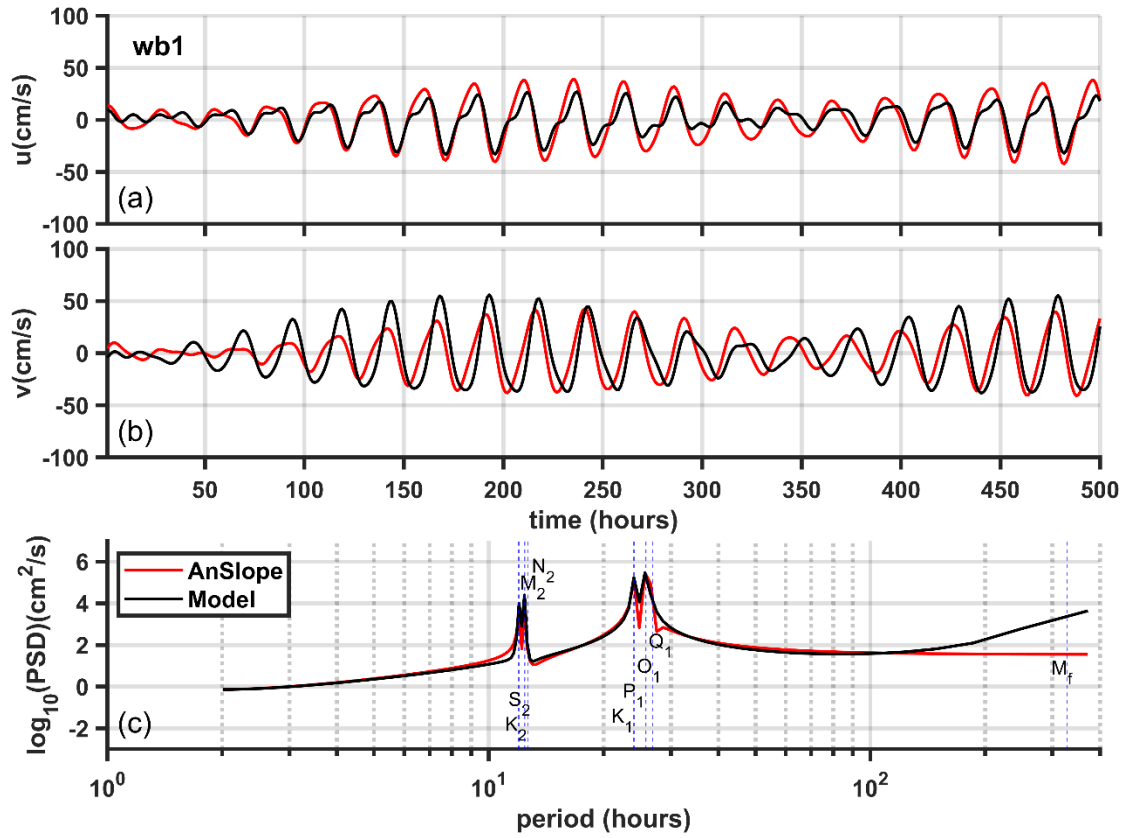

Figure S15. Comparison for mooring wb1, otherwise as in Figure S1.

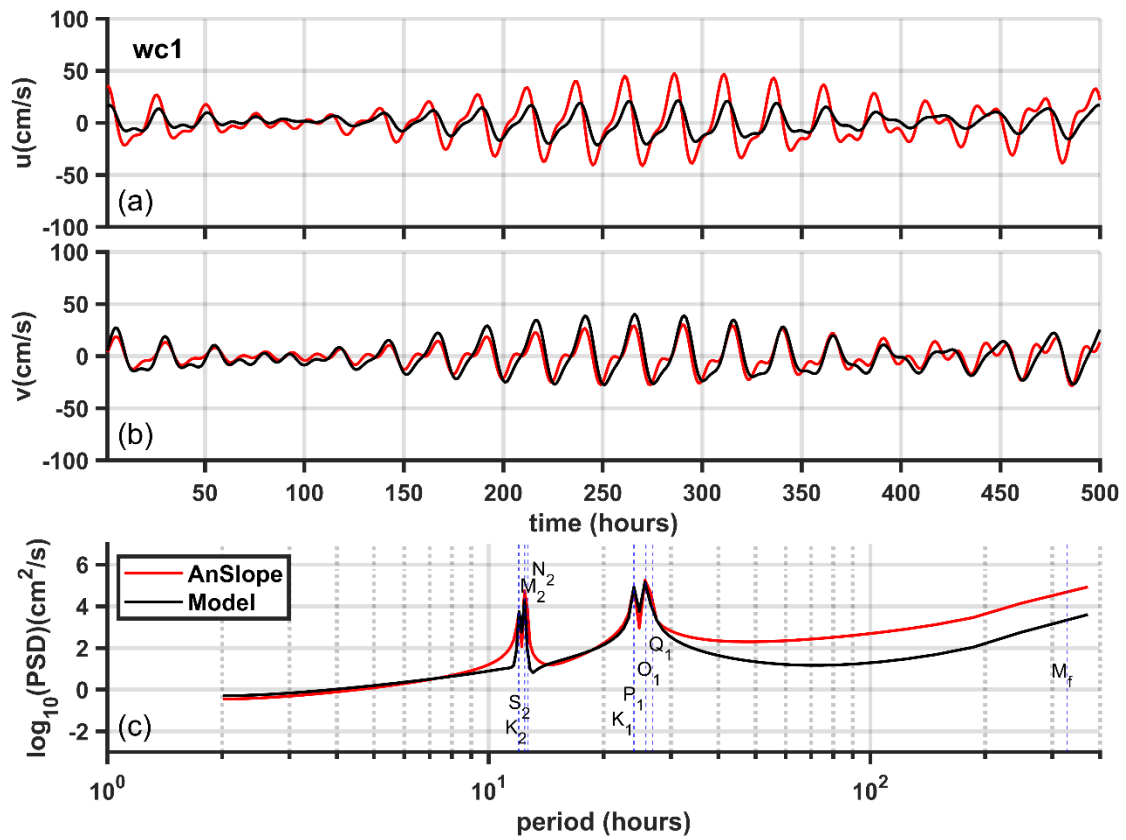

Figure S16. Comparison for mooring wc1, otherwise as in Figure S1.

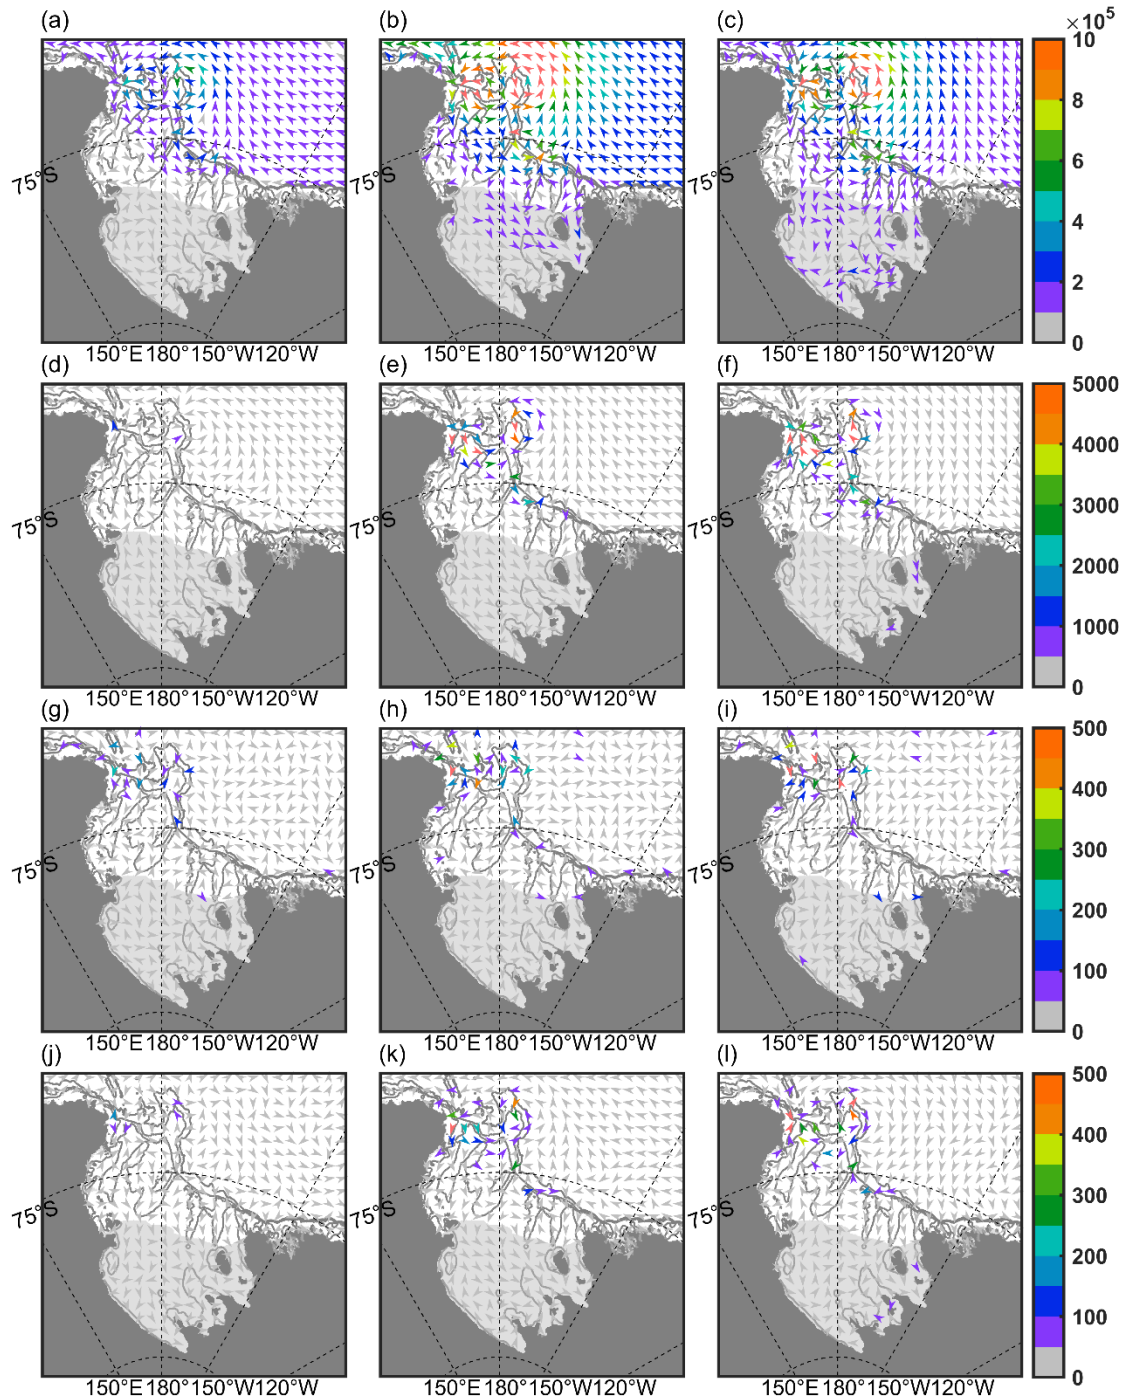

**Figure S17.** Depth-integrated energy flux ( $\text{W/m}$ ) components: (a–c) barotropic pressure work, (d–f) barotropic advective work, (g–i) baroclinic pressure work, and (j–l) baroclinic advective work. From left to right, the columns correspond to the time-averaged values, snapshots at high tide, and snapshots at low tide, respectively.
